# Supplementary material
Source: MDPI journal article supplement (https://www.mdpi.com/2673-8430/3/2/18)
Supplement: s1 [file s1 › Supplementary File S1.pdf]

## SUPPLEMENTARY FILES

**Supplementary Table S1.** Relevant characteristics of the study sample.

| Variables                               | Study sample (N=65) |
|-----------------------------------------|---------------------|
| <b>Presence of symptoms</b>             | 62 (95.4%)          |
| <b>Subfebrility</b>                     | 28 (43.1%)          |
| <b>Febrility</b>                        | 29 (44.6%)          |
| <b>Cough</b>                            | 36 (55.4%)          |
| <b>Dyspnea</b>                          | 15 (23.1%)          |
| <b>Headache</b>                         | 16 (24.6%)          |
| <b>Sore throat</b>                      | 13 (20.0%)          |
| <b>Malaise</b>                          | 49 (75.4%)          |
| <b>Rhinorrhea</b>                       | 3 (4.6%)            |
| <b>Anosmia</b>                          | 4 (6.2%)            |
| <b>Diarrhea</b>                         | 13 (20.0%)          |
| <b>Venous thromboembolism</b>           | 1 (1.5%)            |
| <b>X-ray confirmed pneumonia</b>        | 46 (70.8%)          |
| <b>X-ray confirmed pleural effusion</b> | 2 (3.1%)            |
| <b>Positive urine culture</b>           | 9 (13.8%)           |
| <b>Positive blood culture</b>           | 4 (6.2%)            |

Abbreviations: None.

**Supplementary Table S2.** ROC curve analysis of ImAgeS risk score with 30-day post-discharge mortality.

| Variables                | C-statistic (95% CI) | p-value | Sensitivity<br>/<br>specificity | Youden<br>index |
|--------------------------|----------------------|---------|---------------------------------|-----------------|
| <b>ImAgeS risk score</b> | 0.679 (0.519-0.840)  | 0.027   | 58.0/85.0                       | 69.15           |

**Note:** ImAgeS – novel clinical risk score.

**Supplementary Table S3.** Association of different patient characteristics with 30-day post-discharge mortality.

| Variables                   | aOR (95% CI)*              |
|-----------------------------|----------------------------|
| Age                         | 1.04 (0.95-1.14), p=0.440  |
| Male sex                    | 1.66 (0.31-9.06), p=0.558  |
| Diabetes mellitus           | 3.16 (0.64-15.65), p=0.159 |
| Arterial hypertension       | 0.64 (0.10-4.17), p=0.640  |
| Chronic heart failure       | 6.70 (0.75-60.10), p=0.089 |
| Transplant duration (years) | 1.10 (0.98-1.23), p=0.092  |

\*Binomial multivariable logistic regression model.

**Abbreviations:** aOR – adjusted odds ratios; CI – confidence intervals.

**Supplementary Figure S1.** Flow diagram.

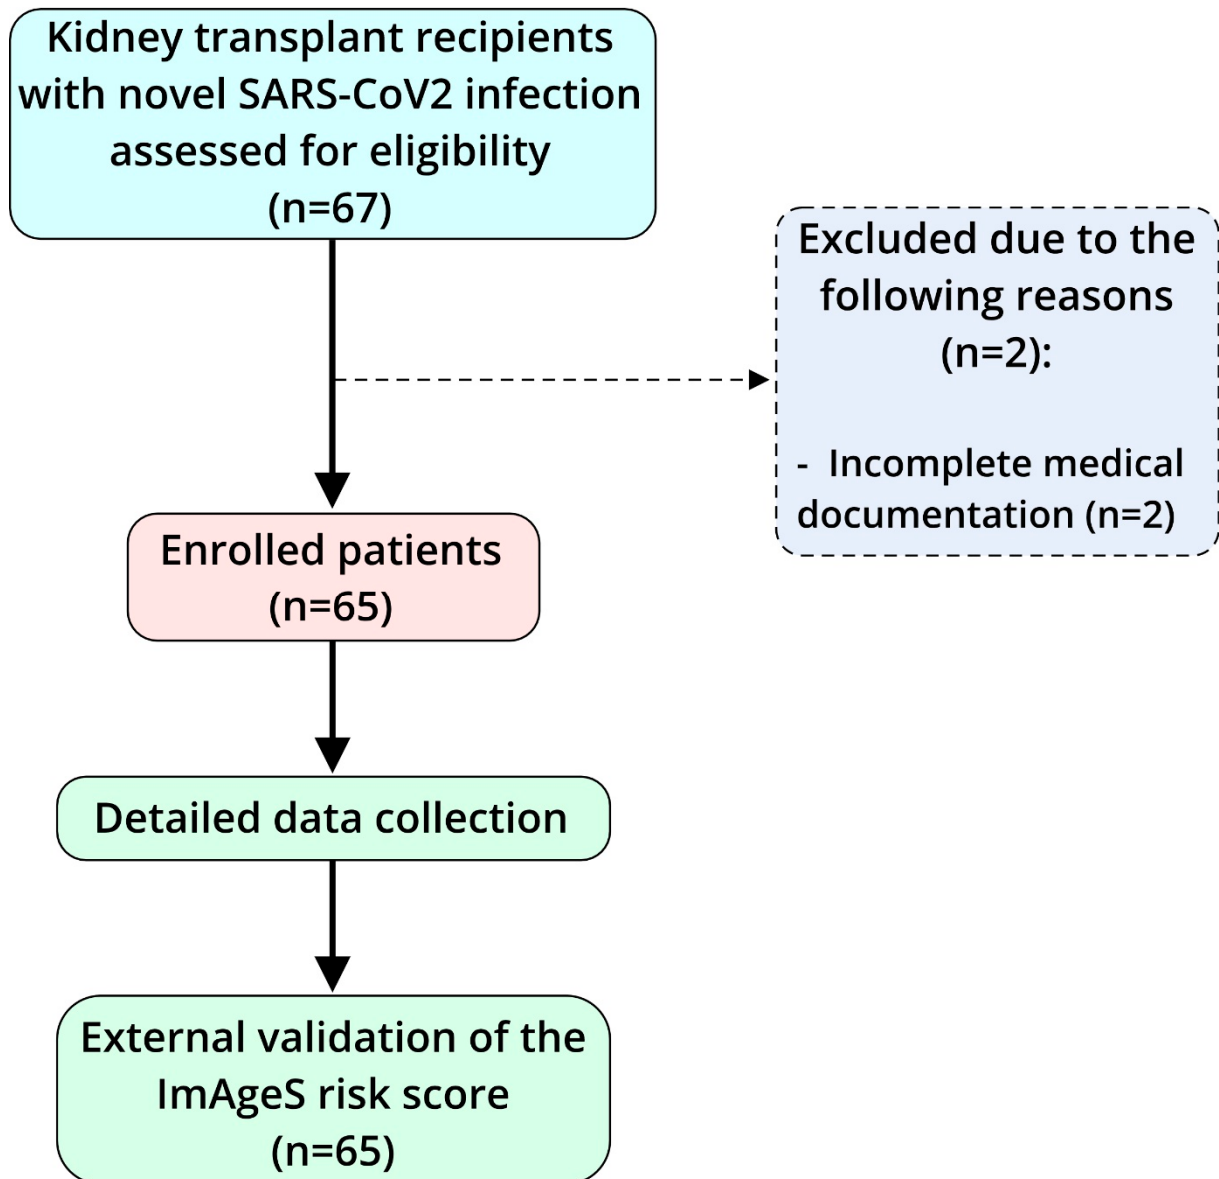

**Note:** ImAgeS – novel clinical risk score.

**Legend:** COVID-19 – Coronavirus disease 2019.

**Supplementary Figure S2. Calibration plot**

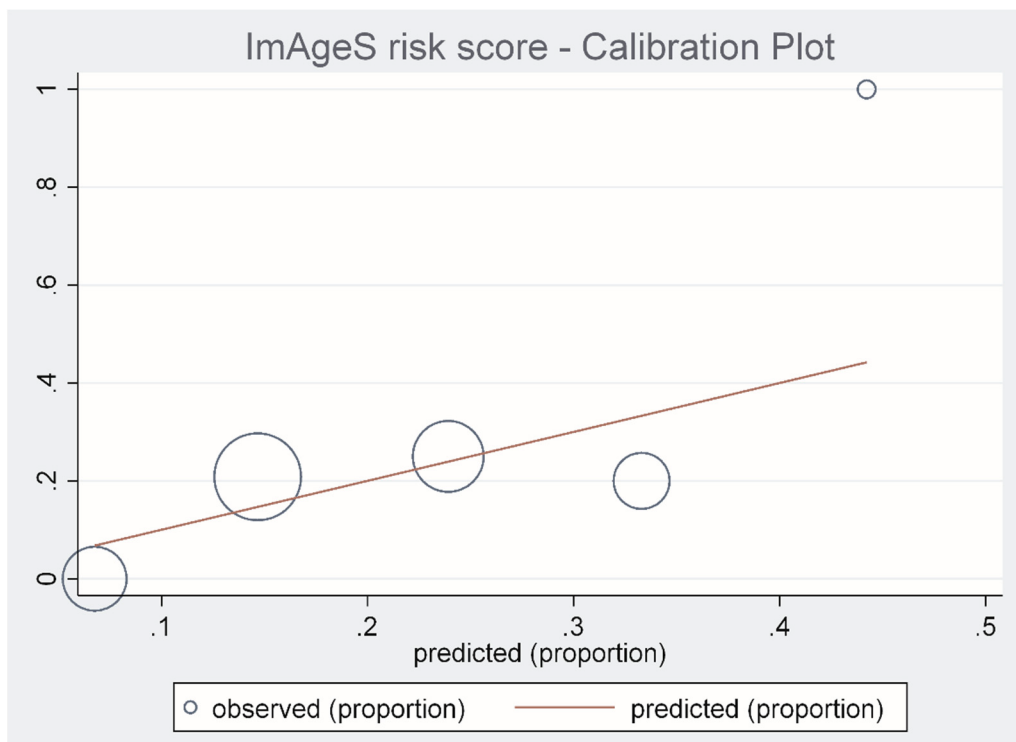

**Note:** ImAgeS – novel clinical risk score.
